# Supplementary material for: Determination of amylose in Iranian rice by multivariate calibration of the surface plasmon resonance spectra of silver nanoparticles
Source: Royal Society of Chemistry journal article supplement (doi:10.1039/c0an00863j), 2011-01-01
Supplement: c0an00863j.pdf [file c0an00863j.pdf]

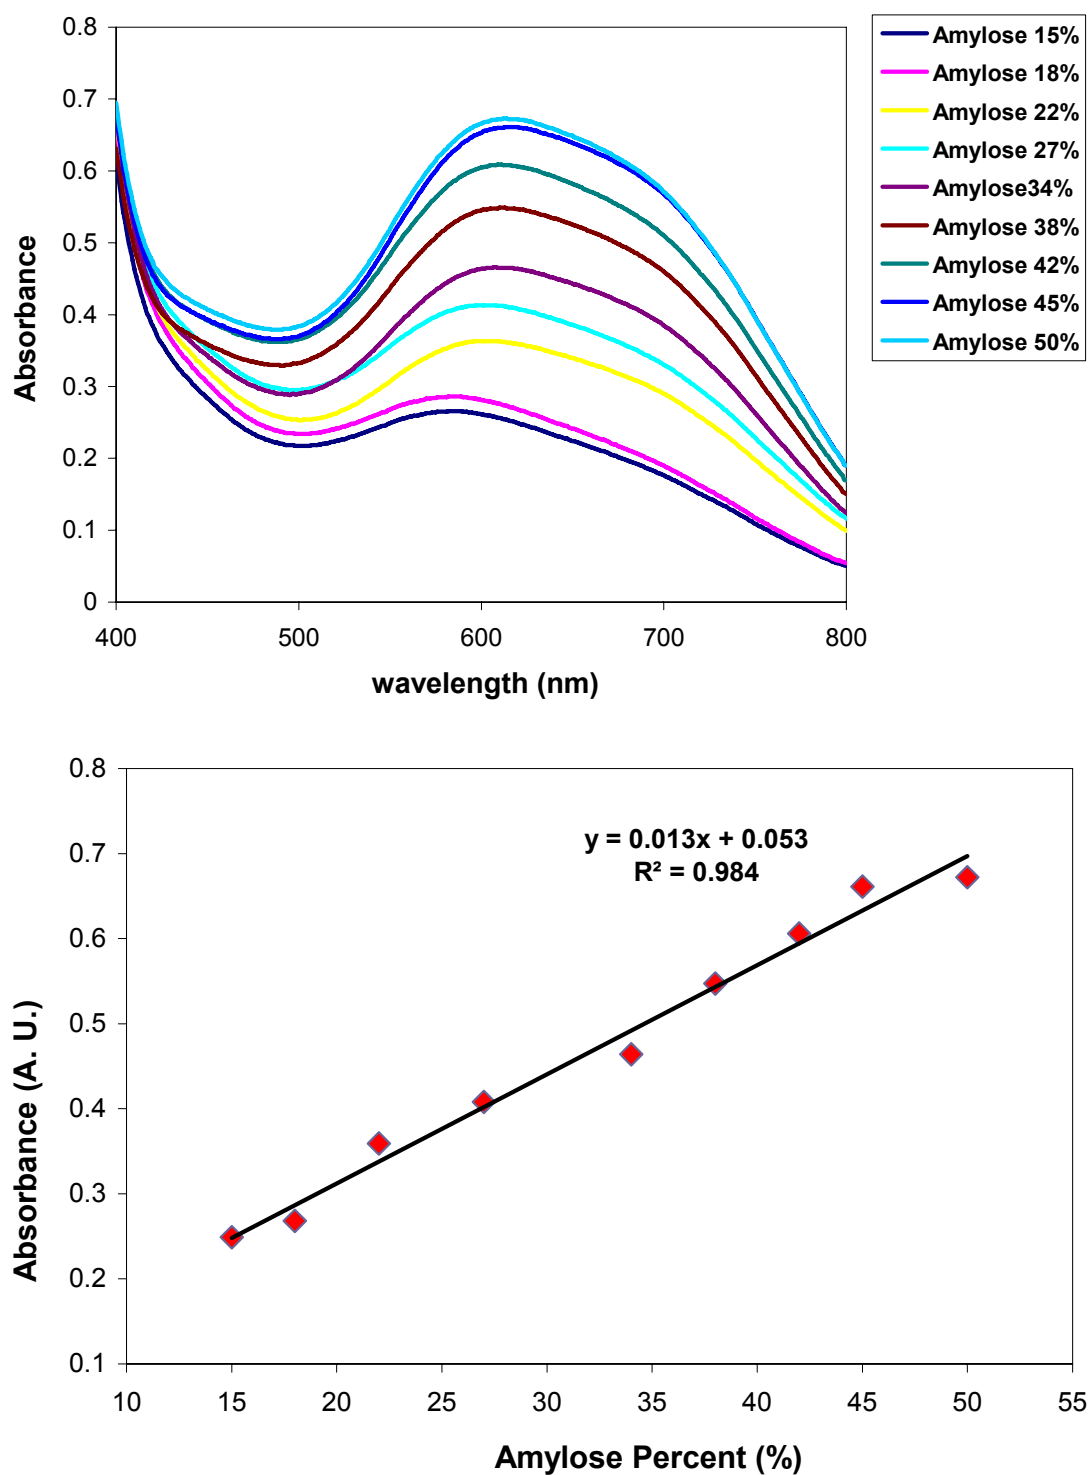

**Fig. S1.** The absorbance spectra (a) and calibration graph measured at 625 nm (b) of the reference method for determination of amylose in rice.

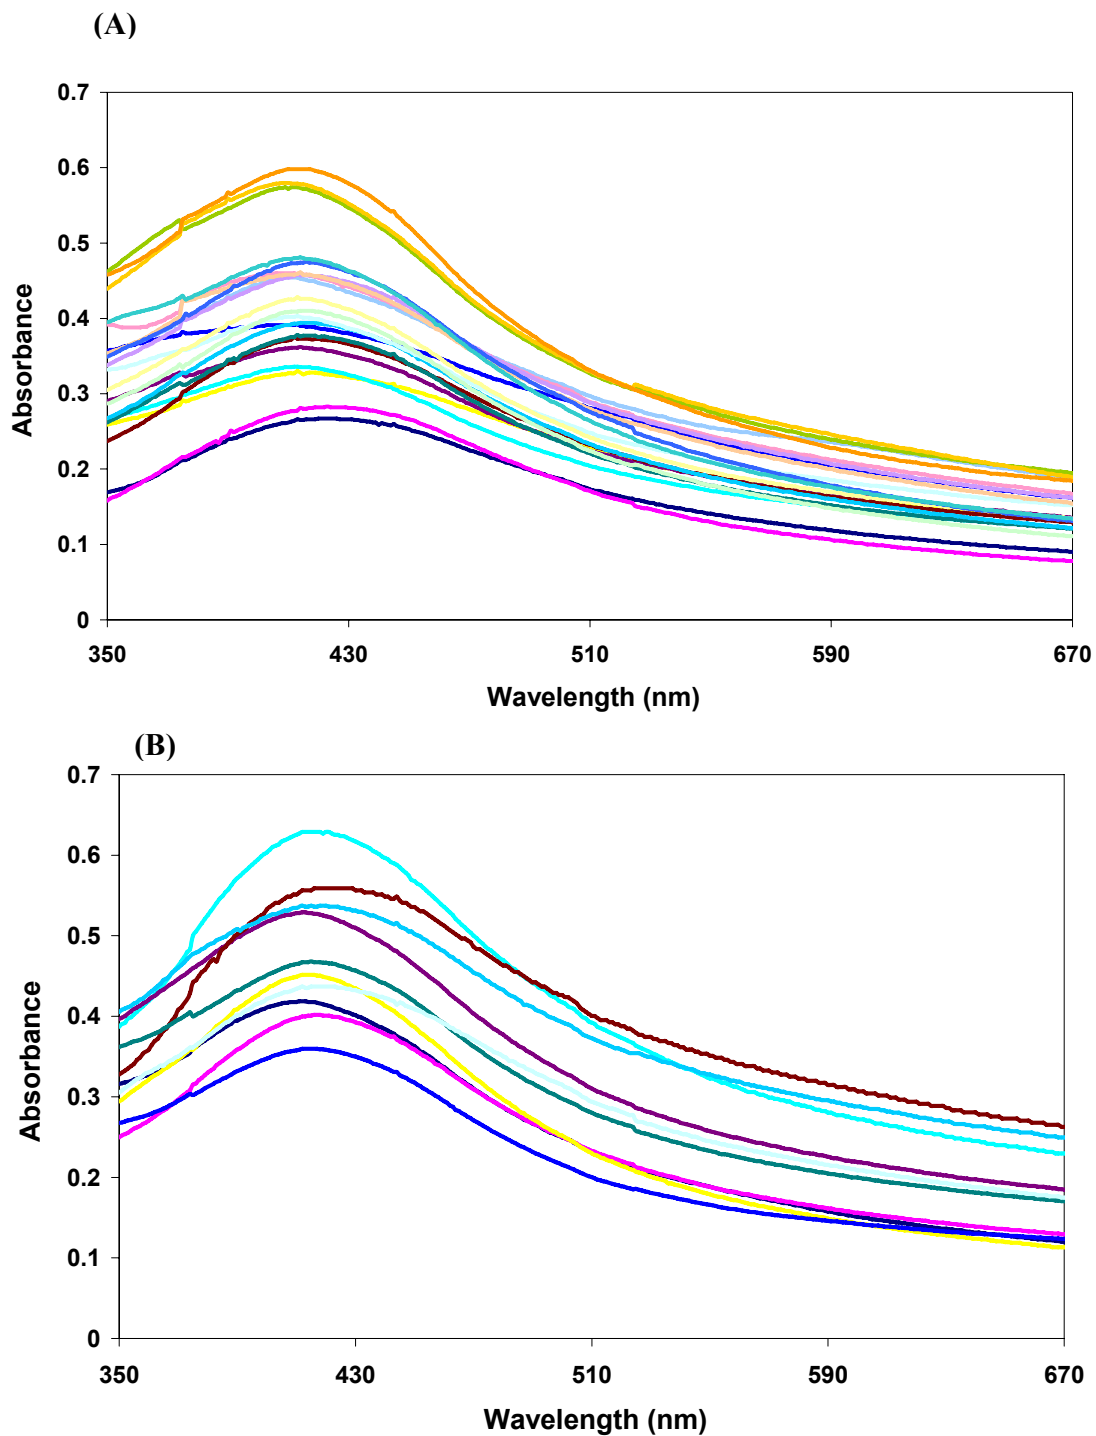

Figure S2. The SPR absorbance spectra of the (A) calibration and (B) test samples

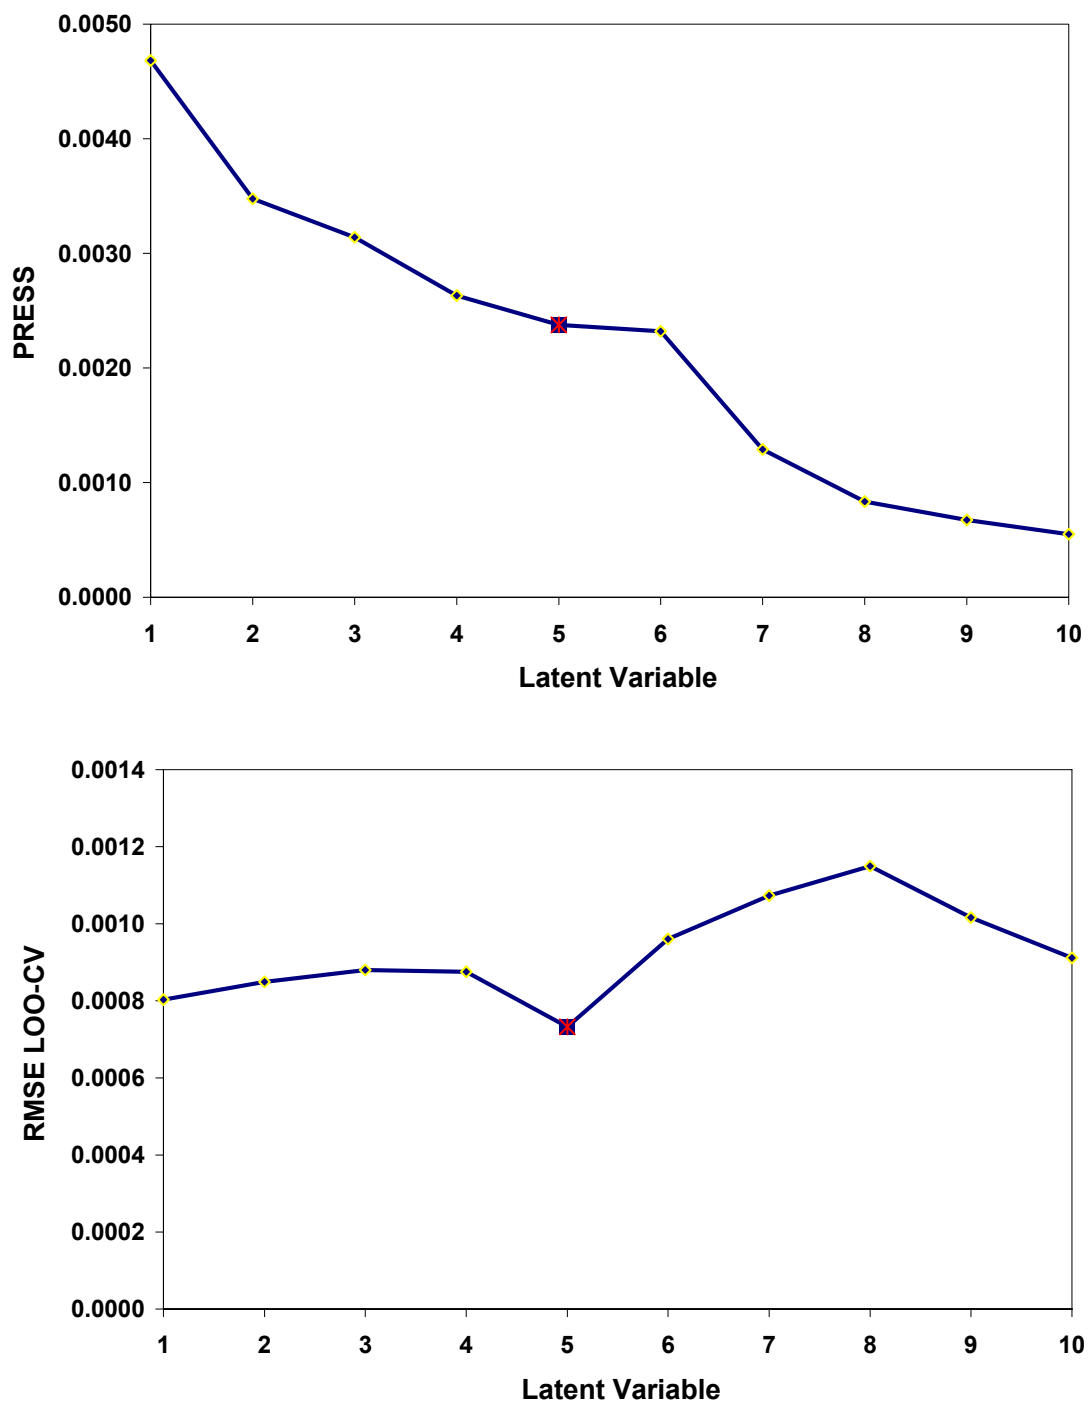

**Fig. S3. Determination of the number of PLS latent variables.**

Supplementary Material (ESI) for Analyst  
This journal is © The Royal Society of Chemistry 2010
